# Supplementary material for: Simple Plex™: A Novel Multi‐Analyte, Automated Microfluidic Immunoassay Platform for the Detection of Human and Mouse Cytokines and Chemokines
Source: PubMed Central journal article supplement (PMC5084752; doi:10.1111/aji.12512), 2016-05-11
Supplement: AJI-75-678-s001.pdf [file AJI-75-678-s001.pdf]

## Supplemental Figure 1

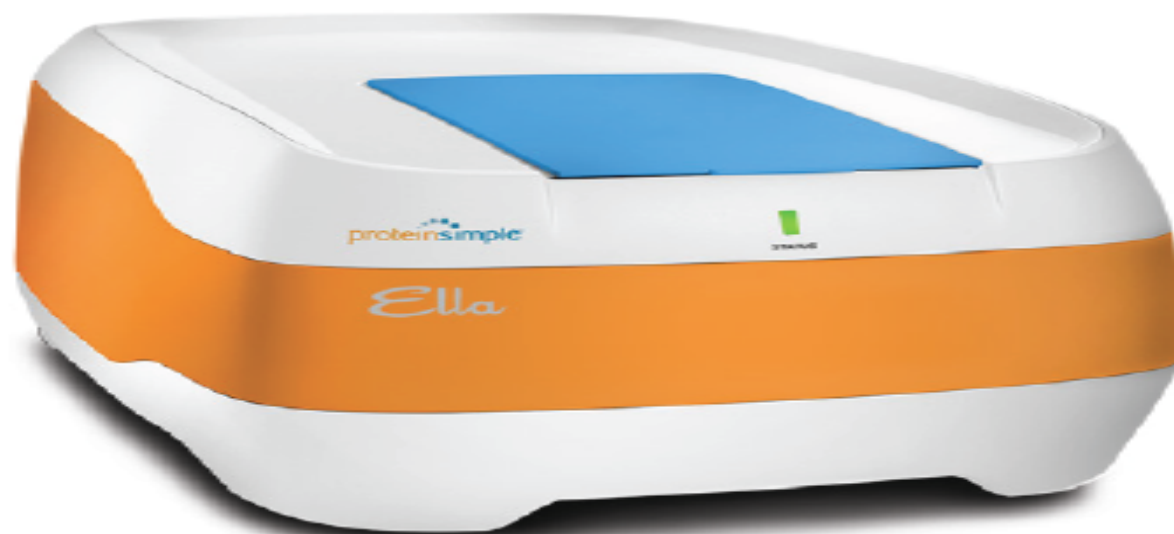

## Supplemental Figure 2

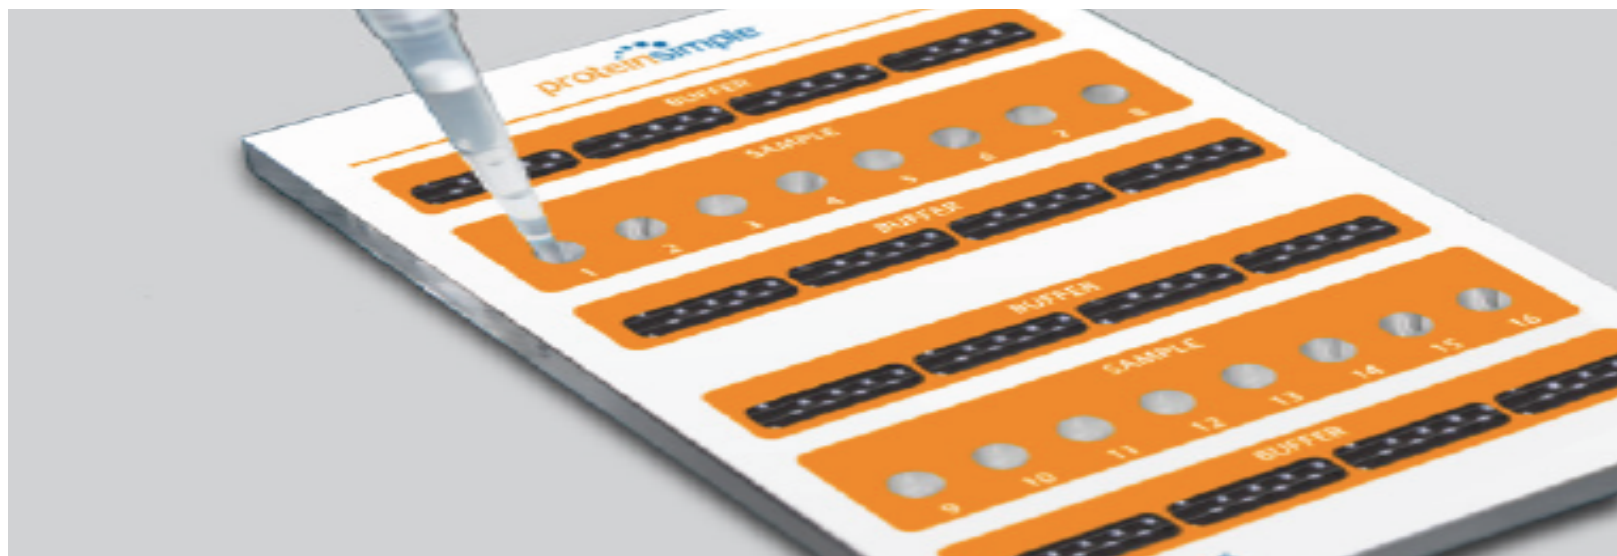

## Supplementary Figure Legends

### Sup 1 and 2. Components of the Simple Plex immunoassay system:

1) **The desktop Ella Analyzer**, a microfluidic analyzer connected to a PC computer via USB and Ethernet cables. The PC has the Simple Plex Runner instrument control software, the Simple Plex Explorer data analysis software, and a barcode scanner to streamline data entry.

2) **The Simple Plex microfluidic cartridge**, an assay kit that contains a disposable cartridge, and all the reagents required to run the test.
